# Supplementary material for: An aptamer agonist of the insulin receptor acts as a positive or negative allosteric modulator, depending on its concentration
Source: PubMed Central journal article supplement (PMC9076861; doi:10.1038/s12276-022-00760-w), 2022-04-27
Supplement: 12276_2022_760_MOESM1_ESM.pdf [file 12276_2022_760_MOESM1_ESM.pdf]

# Supplementary Fig. 1

a.

| 2'-OMe variants | sequence                   |
|-----------------|----------------------------|
| #1 1-mC         | mCA66ACGCA6GAG6C6AGA6CCG6C |
| #2 2-mA         | CmA66ACGCA6GAG6C6AGA6CCG6C |
| #3 5-mA         | CA66mACGCA6GAG6C6AGA6CCG6C |
| #4 6-mC         | CA66AmCGCA6GAG6C6AGA6CCG6C |
| #5 7-mG         | CA66ACmGCA6GAG6C6AGA6CCG6C |
| #6 8-mC         | CA66ACGmCA6GAG6C6AGA6CCG6C |
| #7 9-mA         | CA66ACGCAm6GAG6C6AGA6CCG6C |
| #8 11-mG        | CA66ACGCA6mGAG6C6AGA6CCG6C |
| #9 12-mA        | CA66ACGCA6GmAG6C6AGA6CCG6C |
| #10 13-mG       | CA66ACGCA6GAmG6C6AGA6CCG6C |
| #11 15-mC       | CA66ACGCA6GAG6mC6AGA6CCG6C |
| #12 17-mA       | CA66ACGCA6GAG6C6mAGA6CCG6C |
| #13 18-mG       | CA66ACGCA6GAG6C6AmGA6CCG6C |
| #14 19-mA       | CA66ACGCA6GAG6C6AGmA6CCG6C |
| #15 21-mC       | CA66ACGCA6GAG6C6AGA6mCCG6C |
| #16 22-mC       | CA66ACGCA6GAG6C6AGA6CmCG6C |
| #17 23-mG       | CA66ACGCA6GAG6C6AGA6CCmG6C |
| #18 25-mC       | CA66ACGCA6GAG6C6AGA6CCG6mC |

b.

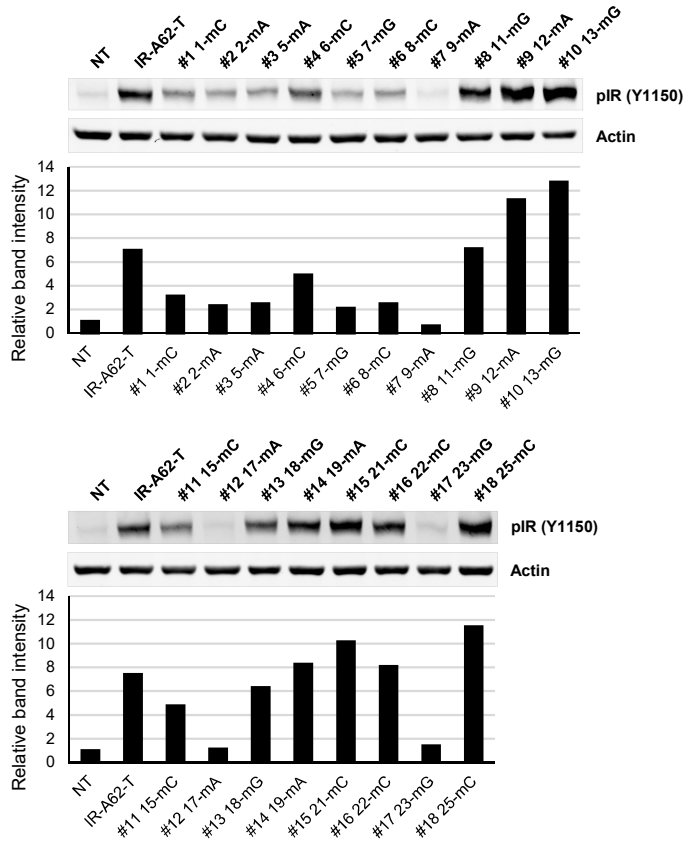

c.

| 2'-OMe combination | Sequence                       |
|--------------------|--------------------------------|
| Com #1             | CA66ACGCA6mGmAmG6C6AGA6mCCG6C  |
| Com #2             | CA66ACGCA6mGAmG6C6AGA6mCCG6C   |
| Com #3             | CA66ACGCA6GmAmG6C6AGA6mCCG6C   |
| Com #4             | CA66ACGCA6GAmG6C6AGmA6mCCG6C   |
| Com #5             | CA66ACGCA6GAmG6C6AGA6mCmCG6C   |
| Com #6             | CA66ACGCA6GAmG6C6AGA6mCCG6mC   |
| Com #7             | CA66ACGCA6GAmG6C6AGA6mCCG6C    |
| Com #8             | CA66ACGCA6mGAmG6C6AGmA6mCCG6mC |

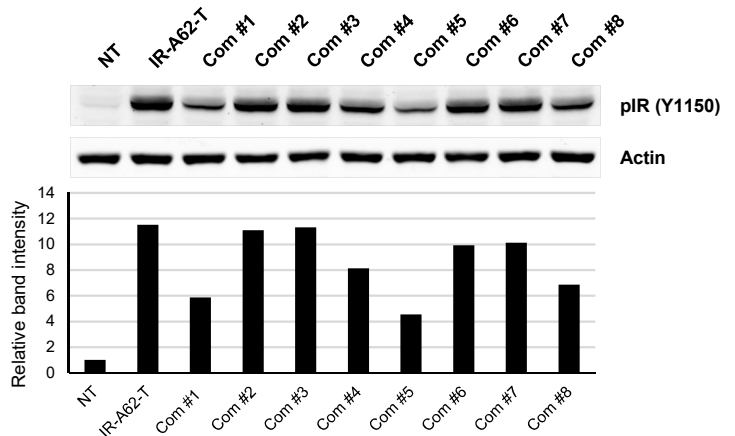

**Supplementary Fig. 1** (a) Sequences of IR-A62-T variants in which each dA, dC and dG nucleotide was substituted by the corresponding 2'-OMe-derivative (mA, mC and mG). (b) The level of IR Y1150 phosphorylation by the IR-A62-T variants containing 2'-OMe substitution was estimated in Rat-1/hIR cells using western blotting. (c) Combinations of 11-mG, 12-mA, 13-mG, 19-mA, 21-mC, 22-mC and 25-mC. The level of IR Y1150 phosphorylation by the combinations was estimated in Rat-1/hIR cells.

## Supplementary Fig. 2

a.

| 2'-F variants | sequence                   |
|---------------|----------------------------|
| #1 1-fC       | fCA66ACGCA6GAG6C6AGA6CCG6C |
| #2 2-fA       | CfA66ACGCA6GAG6C6AGA6CCG6C |
| #3 5-fA       | CA66fACGCA6GAG6C6AGA6CCG6C |
| #4 6-fC       | CA66AfCGCA6GAG6C6AGA6CCG6C |
| #5 7-fG       | CA66ACfGCA6GAG6C6AGA6CCG6C |
| #6 8-fC       | CA66ACGfCA6GAG6C6AGA6CCG6C |
| #7 9-fA       | CA66ACGCfA6GAG6C6AGA6CCG6C |
| #8 12-fA      | CA66ACGCA6GfAG6C6AGA6CCG6C |
| #9 15-fC      | CA66ACGCA6GAG6fC6AGA6CCG6C |
| #10 17-fA     | CA66ACGCA6GAG6C6fAGA6CCG6C |
| #11 18-fG     | CA66ACGCA6GAG6C6AfGA6CCG6C |
| #12 19-fA     | CA66ACGCA6GAG6C6AGfA6CCG6C |
| #13 22-fC     | CA66ACGCA6GAG6C6AGA6CfCG6C |
| #14 23-fG     | CA66ACGCA6GAG6C6AGA6CCfG6C |

b.

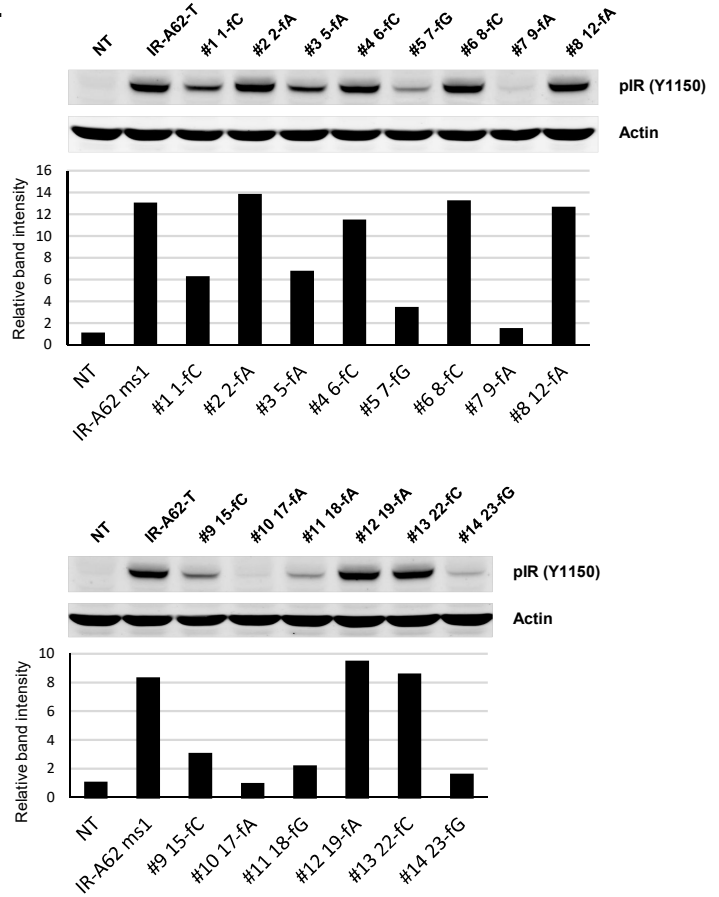

c.

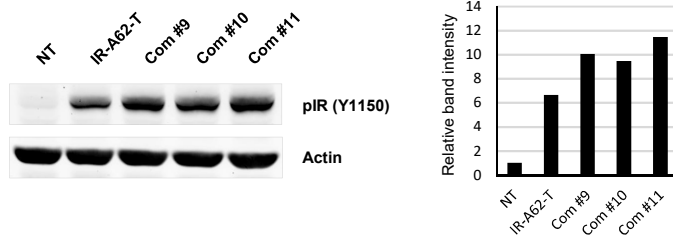

| 2'-OMe + 2'-F combination | Sequence                            |
|---------------------------|-------------------------------------|
| Com #9                    | CfA66AfCGfCA6mGfAmG6C6AGA6mCCG6mC   |
| Com #10                   | CA66ACGCA6mGAmG6C6AGfA6mCfCG6mC     |
| Com #11                   | CfA66AfCGfCA6mGfAmG6C6AGfA6mCfCG6mC |

**Supplementary Fig. 2** (a) Sequences of IR-A62-T variants containing the corresponding 2'-F-derivatives (fA, fC and fG) in place of each nucleotide. (b) The level of IR Y1150 phosphorylation by the IR-A62-T variants containing 2'-F substitution was estimated in Rat-1/hIR cells using western blotting. (c) Combinations of 11-mG, 12-mA, 13-mG, 19-mA, 21-mC, 22-mC, 25-mC, 2-fA, 6-fC, 8-fC, 12-fA, 19-fA and 22-fC. The level of IR Y1150 phosphorylation by the combinations was estimated in Rat-1/hIR cells using western blotting.

## Supplementary Fig. 3

a.

| Bz variants | sequence                  |
|-------------|---------------------------|
| #1 3-Bz     | CAZPACGCAPGAGPCPAGAPCCGPC |
| #2 4-Bz     | CAPZACGCAPGAGPCPAGAPCCGPC |
| #3 10-Bz    | CAPPACGCAZGAGPCPAGAPCCGPC |
| #4 14-Bz    | CAPPACGCAPGAGZCPAGAPCCGPC |
| #5 16-Bz    | CAPPACGCAPGAGPCZAGAPCCGPC |
| #6 20-Bz    | CAPPACGCAPGAGPCPAGAZCCGPC |
| #7 24-Bz    | CAPPACGCAPGAGPCPAGAPCCGZC |

b.

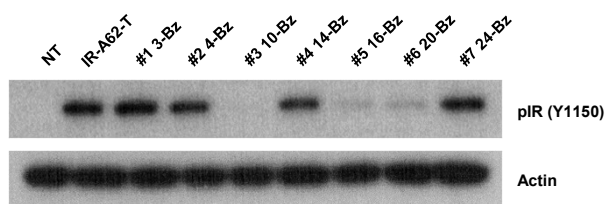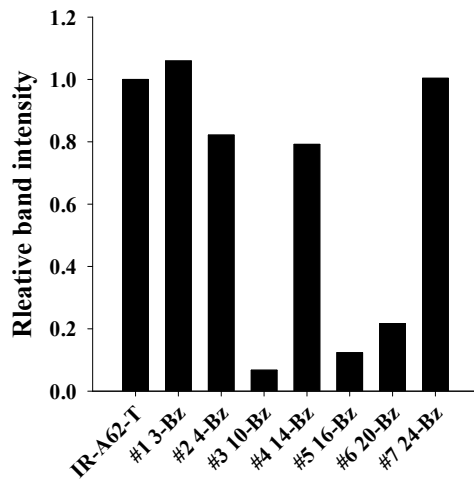

**Supplementary Fig. 3** (a) Sequences of IR-A62-T variants in which each Nap-dU was replaced by Bn-dU. (b) The level of IR Y1150 phosphorylation by the IR-A62-T variants containing Bn-dU substitution was estimated in Rat-1/hIR cells using western blotting.

## Supplementary Fig. 4

### Replicate #1

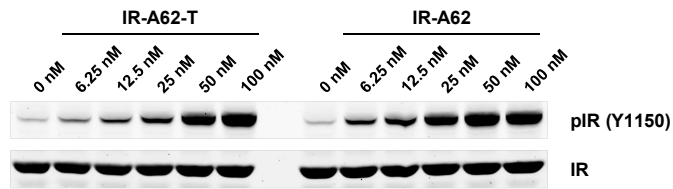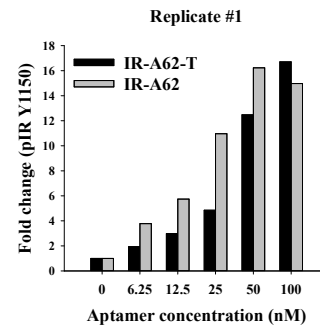

### Replicate #2

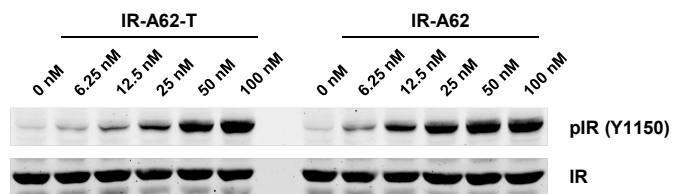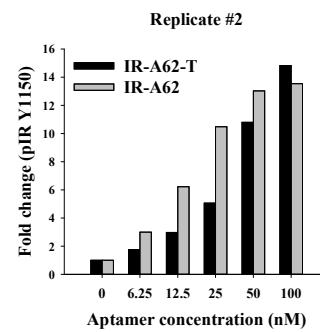

**Supplementary Fig. 4** Comparison of concentration-response between unmodified IR-A62-T and fully modified IR-A62. Rat-1/hIR cells were stimulated with various concentrations of IR-A62-T or IR-A62 for 1 h, and the level of IR Y1150 phosphorylation was estimated using western blotting. These experiments were independently replicated.
